# Supplementary material
Source: publisher figshare collection journal article supplement (https://geolsoc.figshare.com/ndownloader/files/7650427)
Supplement: Supplementary file 1 [file 7650427]

## Sheet: Tabelle1
Sample	Comment	Fraction	K2O	40Ar		Age	2σ-Error
			(Wt. %)	(nl/g)	(%)	(Ma)	(Ma)
UY-14-14 Fine fractions	Limit age for mylonite cooling	<0.2 μm	5.35	91.4929	91.7837	465.3	7.3
		<2 μm	6.7	126.049	94.772	505.7	10.9
		2-6 μm	8.17	163.623	98.5441	533.7	8.3
UY-15-14 Fault gouge	Associated to the SBSZ	<0.2 μm	0.14	0.4014	79.4462	87.4	2
			0.14	0.4529	34.3457	98.3	3.4
		<2 μm	0.12	0.6169	75.0946	152.8	3.6
			0.12	0.6295	80.1759	155.7	3.6
		2-6 μm	0.19	1.24	27.5757	193.7	8.3
UY-16-14 Fault gouge	Associated to the SBSZ	<0.2 μm	0.09	0.2857	49.323	92.8	4
			0.09	0.2694	43.999	87.7	3.9
		<2 μm	0.1	0.2549	45.3493	81.3	1.9
		2-6 μm	0.07	0.454	52.1712	190.7	4.3
UY-21-13 Fault gouge	Associated to the MASZ	<0.2 μm	0.73	3.24	84.41	132.4	1.6
		<2 μm	1.14	6.37	92.49	165.4	3.1
		2-6 μm	0.67	11.96	95.36	480.7	5
UYFG 1 Fault gouge	Associated to the RSZ	<0.2 μm	7.34	93.43	97.71	356.9	6.1
		<2 μm	6.94	94.97	97.86	381.1	5.9
		2-6 μm	4.7	75.13	96.4	437.9	7
UYFG 2 Fault gouge	Associated to the RSZ	<0.2 μm	7.99	105.45	98.64	368.8	9.8
		<2 μm	7.34	103.62	99.07	391.9	5.9
		2-6 μm	5.4	85.95	99.8	436.3	6.6
SBSZ – Sierra Ballena Shear Zone, MASZ – Maria Albina Shear Zone, RSZ – Rivera Shear Zone
